## **The genetic Allee effect:**

### **A unified framework for the genetics and demography of small populations**

Gloria M. Luque <sup>2</sup>, Chloé Vayssade <sup>1</sup>, Benoît Facon <sup>4</sup>, Thomas Guillemaud <sup>1</sup>, Franck Courchamp <sup>2,3</sup> & Xavier Fauvergue <sup>1\*</sup>

<sup>1</sup> UMR 1355-7254 Institut Sophia Agrobiotech, INRA, CNRS, Université Nice Sophia Antipolis, 06903 Sophia Antipolis, France

<sup>2</sup> UMR 8079 Ecologie, Systématique & Evolution, CNRS, Université Paris Sud, 91405 Orsay, France

<sup>3</sup> Department of Ecology and Evolutionary Biology & Center for Tropical Research, Institute of the Environment and Sustainability, University of California Los Angeles, CA 90095, USA

<sup>4</sup> UMR 1062, CBGP, INRA, Montpellier, France

\* To whom correspondence should be addressed: [xavier.fauvergue@sophia.inra.fr](mailto:xavier.fauvergue@sophia.inra.fr)

## Abstract

The Allee effect is a theoretical model predicting low growth rates and the possible extinction of small populations. Historically, studies of the Allee effect have focused on demography. As a result, underlying processes other than the direct effect of population density on fitness components are not generally taken into account. There has been heated debate about the potential of genetic processes to drive small populations to extinction, but such processes clearly do have an impact on small populations over short time scales, and some may generate Allee effects. However, as opposed to the ecological Allee effect, which is underpinned by cooperative interactions between individuals, genetically driven Allee effects require a change in genetic structure to link the decline in population size with a decrease in fitness components. We therefore define the genetic Allee effect as a two-step process whereby a decrease in population size leads to a change in population genetic structure, and in turn, to a decrease in individual fitness. We describe potential underlying mechanisms, and review the evidence for this original type of component Allee effect, using published examples from both plants and animals. The possibility of considering demogenetic feedback in light of genetic Allee effects clarifies the analysis and interpretation of demographic and genetic processes, and the interplay between them, in small populations.

## Keywords

Allee effect, small populations, eco-evolutionary feedback, inbreeding depression, drift load, migration load.

## Introduction

The Allee effect can be defined as a decrease in fitness caused by a decrease in population size (Stephens *et al.* 1999). The Allee effect jeopardizes the persistence of small populations, whether declining or bottlenecked (threatened species: Angulo *et al.* 2007, Bonsall *et al.* 2014, Kuparinen *et al.* 2014; introduced/invasive species: Davis *et al.* 2004, Johnson *et al.* 2006, Taylor and Hastings 2005). This concept, first introduced by the American ecologist Warder Clyde Allee in the 1930s, has been the focus of growing interest from population ecologists over the last two decades. In 1999, Stephens *et al.* formalized the definition of Allee effects, making a crucial distinction between component and demographic Allee effects. A component Allee effect is a decrease in the value of any component of individual fitness caused by a decrease in population size. A demographic Allee effect is the consequent decrease in the *per capita* growth rate of the population caused by a decrease in population size and resulting from one or several component Allee effects. Allee effects have been discovered in a wide range of taxa, with various mechanisms underpinned by a shortage of cooperative interactions at low density (Courchamp *et al.* 2008, Courchamp *et al.* 1999).

Population dynamicists working on the Allee effect may have overlooked the fact that genetic processes can also impact populations at an ecological time scale of only a few generations (Glémin 2003, Spielman *et al.* 2004). This is particularly relevant when genetic processes are combined with demographic processes, such as demographic and environmental stochasticity (Hanski and Saccheri 2006, Tanaka 2000). Some of these genetic mechanisms can generate component Allee effects (Courchamp *et al.*, 1999) because they generate a positive relationship between population size and fitness (Berec *et al.* 2007, Fischer *et al.* 2000, Willi *et al.* 2005). These mechanisms are inbreeding depression (Frankham 1995, Spielman *et al.*

2004), a loss of genetic variation (Amos and Balmford 2001, Gomulkiewicz and Holt 1995), and the accumulation of deleterious mutations (Lande 1994, Lynch *et al.* 1995).

Contrasting with the pervasive evidence that genetic mechanisms affect the dynamics of small populations, even in the short term, fewer than ten publications have made specific reference to a genetic Allee effect. There are two possible reasons for the lack of studies considering genetic Allee effects. First, although mentioned in a handful of studies, the genetic Allee effect has never been formally defined, so the concept may still be too vague to stimulate new studies. Second, the genetic mechanisms occurring in small populations are the classic territory of population genetics, whereas the Allee effect is a concept derived principally from population dynamics. These two communities view populations differently and usually work on different entities (*e.g.*, individual numbers vs. genotype frequencies), concepts and time scales. Dynamicists may also usually view genetic processes as affecting populations only in the long term. This would make them likely to think that small populations do not generally stay small for long enough (because they grow or disappear due to demographic processes) to suffer from genetic Allee effects. There may have been too little dialog between the two disciplines as yet (Kokko and Lopez-Sepulcre 2007, Metcalf and Pavard 2007, Pelletier *et al.* 2009) for the genetic Allee effect to have emerged as a robust unifying paradigm.

The aim of this work is to propose the genetic Allee effect as a heuristic framework for studying the interplay between genetics and demography in small populations. We first propose a formal definition for the genetic Allee effect and describe the processes potentially underlying this effect. We review the evidence for genetic Allee effects, including population genetic studies, which, although not referring to the Allee effect, provide numerous examples of genetic Allee effects. Based on these examples, we then propose methods for detecting genetic Allee effects and distinguishing them from ecological Allee effects. In the last section of

the paper, we discuss the specificity, limits, and demographic consequences of genetic Allee effects.

## Definition

One fundamental principle of evolutionary biology is that a population is a collection of different genotypes displayed by a number of different individuals. Changes in genotype frequencies are due to changes in the number, frequency and association of different alleles within and between loci. These genotype frequencies are referred to hereafter as the (within-population) genetic structure. Changes in genetic structure yield changes in the fitness components that these genotypes influence (Soulé 1980). This relationship underlies the Allee effect because population size is one of the determinants of genetic structure (Nielsen and Slatkin 2013). Here, in accordance with the evolutionary paradigm described by Waples and Gaggiotti (2006), the term “population” refers to a “a group of individuals of the same species living in close enough proximity that any member of the group can potentially mate with any other member”. Unlike population dynamicists, we use the term “population size” to mean the number of individuals that effectively reproduce. We prefer to use this term, rather than effective population size, because the latter is difficult to measure in natural populations and has an ambiguous meaning resulting from its various definitions (the “inbreeding effective population size,” the “variance effective population size,” and the “eigenvalue effective population size”; see details in Sjödin *et al.* 2005). Population size, genetic structure, and fitness components are the three cornerstones of the genetic Allee effect.

The term “genetic Allee effect” is not new (first used by Fischer *et al.* 2000), but it has seldom been used, and still lacks a proper definition. We define the genetic Allee effect as a

two-step process characterized by (1) a change in population genetic structure due to a decrease in population size, and (2) a consequent decrease in individual fitness. This decrease in individual fitness may subsequently lead to a further decrease in population size. These two steps act sequentially to generate a genetically driven component Allee effect. The first step of the genetic Allee effect occurs when population size affects at least one of the following aspects of genetic structure: heterozygosity, frequency of beneficial or detrimental alleles, or allelic richness (Fig. 1). During the second step, any of these changes in population genetic structure may decrease a component of individual fitness through inbreeding depression, drift load or migration load. If, and only if, both steps occur, a genetic Allee effect occurs. The genetic Allee effect therefore contrasts with what could be referred to as an ecological Allee effect, in which individual fitness decreases as a straightforward, one-step consequence of a decrease in population size or population density.

### **Mechanisms underlying genetic Allee effects**

Our literature search identified 15 studies showing strong evidence for one or several genetic Allee effects in natural or experimental populations (Table 1). Some of these studies did not actually use the term genetic Allee effect. We also identified about another 40 studies suggesting the occurrence of genetic Allee effects (see, for instance, the references cited by Leimu *et al.* 2006). Following a thorough analysis of these published studies, we defined three types of genetic mechanisms generating Allee effects, each involving a major evolutionary force: inbreeding, drift, or migration.

#### *Inbreeding depression*

As population size declines, inbreeding becomes more frequent (Fig. 2; Malécot 1969). An inbred individual results from a cross between two genetically related individuals, and is characterized by a high inbreeding coefficient. Inbred individuals have fewer heterozygous loci than outbred individuals, resulting in a decrease in heterozygosity in declining populations (Frankham 1996, Frankham 1998). A pervasive consequence of low heterozygosity is inbreeding depression, defined as the lower fitness of inbred than of outbred individuals. Hence, inbreeding followed by inbreeding depression fulfills the two conditions defining the genetic Allee effect: (1) a decrease in population size causing a change in population genetic structure (a decrease in heterozygosity) and (2) a decrease in one or several components of fitness caused by this change (Fig. 2; Frankham 1998, Reed and Frankham 2003, Spielman *et al.* 2004). The mechanisms causing inbreeding depression (increase in the expression of deleterious recessive alleles, overdominance, and epistasis; Charlesworth and Willis 2009, Li *et al.* 2008) underlie the second step of a genetic Allee effect. For instance, the buttercup *Ranunculus reptans* suffers from a genetic Allee effect due to inbreeding depression (Table 1A; Willi *et al.* 2005): small populations have a higher mean inbreeding coefficient (Step 1) and populations with higher inbreeding coefficients have lower levels of seed production (Step 2).

### *Drift load*

Here, we define drift as a change in allele frequencies due to the random sampling of alleles from one generation to the next (Wright 1969), and drift load as the decrease in the mean fitness of a population due to drift (Charlesworth *et al.* 1993, Whitlock 2000). Genetic drift is a consequence of finite population size and, like other random processes, such as

demographic stochasticity, the manifestations of genetic drift are more evident in small populations (Fig. 2; Frankham 2005, Gabriel and Burger 1994, Gabriel *et al.* 1991, Grueber *et al.* 2013, Lynch *et al.* 1995, Oostermeijer *et al.* 2003). The balance between drift and selection determines allelic and genotypic frequencies. Selection is a deterministic process whereby the frequency of an allele (or a genotype) varies across generations according to its effect on fitness: beneficial alleles increase in frequency, whereas deleterious alleles decrease in frequency. Unlike drift, the intensity of which increases with decreasing population size, selection does not vary in intensity as a function of population size (Fig. 2), *i.e.*, we do not consider density-dependent selection here. Hence, in small populations, drift intensity often overwhelms selection, so that any changes in the number and frequencies of alleles result principally from drift rather than selection (Kimura 1983, Whitlock 2000).

The change in the selection/drift balance at small population size modifies the frequency of beneficial alleles, allelic richness and the heterozygosity of populations, driving the first step of the genetic Allee effect (Fig. 2). The exact nature of the change in genetic structure depends on the type of selection at work. When drift overwhelms negative selection, mildly deleterious alleles increase in frequency (Lanfear *et al.* 2014). Mildly deleterious alleles sometimes become fixed and constitute the drift load (Glémin 2003, Whitlock 2000). The corollary is that some beneficial alleles, despite being under positive selection, decrease in frequency or even disappear (Lanfear *et al.* 2014). The value of fitness components decreases if these components are influenced by loci that fix detrimental alleles and lose beneficial ones (Step 2). Variations in larval body size in the European common frog *Rana temporaria* provide an interesting example, with drift stronger than selection in small populations and weaker than selection in large populations (Step 1). Consequently, small populations have a higher drift load on larval body size, and display lower values for this fitness component (Table 1B; Johansson *et al.* 2007). Balancing selection also results in drift load. Balancing selection



maintains several alleles at a locus under selection. Balancing selection can be due to overdominance and negative frequency-dependent selection. In small populations, in which drift overwhelms balancing selection, rare alleles can be lost (Eimes *et al.* 2011, Levin *et al.* 2009, Zayed and Packer 2005) and allele frequencies move away from the optimum value (Step 1), decreasing the values of the fitness components they influence (Step 2). For instance, plant self-incompatibility loci undergo balancing selection, triggering a genetic Allee effect. This has been shown in the rare plant *Brassica insularis*, in which smaller populations have fewer alleles at the self-incompatibility locus and, thus, lower rates of fruit set (Glémin *et al.* 2008).

### *Migration load*

Migration load is defined as the decrease in the mean fitness of a population due to the immigration of maladapted alleles and outbreeding depression (e.g. Bolnick and Nosil 2007). With effective dispersal, immigrants from a source population can bring new alleles into a sink population. The proportion of new alleles in the gene pool is higher in small sink populations than in large ones (Fig. 2), so the change in genetic structure depends on population size, fulfilling the conditions for the first step of the genetic Allee effect (Fig. 1). A migration load can occur as a result of local maladaptation and/or outbreeding depression (Lenormand 2002, Ronce and Kirkpatrick 2001) due to underdominance or deleterious epistatic interactions (Edmands 2002). The overrepresentation of new alleles in small populations results in a higher migration load in small populations, satisfying the conditions for the second step of the genetic Allee effect (Fig. 2). We were able to identify a single published example of a genetic Allee effect due to migration load (Table 1C). Populations of *Eucalyptus aggregata* can hybridize with closely related species of eucalypts; the hybridization rate

increases with decreasing population size, and germination rates and seedling survival are lower in populations with a higher proportion of hybrids (Field *et al.* 2008).

### *Combined mechanisms*

As already reported for ecological component Allee effects (Berec *et al.* 2007), several genetic Allee effects may occur simultaneously in the same population. A good example is provided by the concomitant influences inbreeding depression, drift load, and loss of self-incompatibility alleles on small populations of the buttercup *Ranunculus reptans* (Willi *et al.* 2005). Genetic Allee effects can also act in conjunction with ecological Allee effects, as shown in experimental populations of the self-incompatible plants *Raphanus sativus* and *Lolium multiflorum* (Elam *et al.* 2007, Firestone and Jasieniuk 2013).

### **How can a genetic Allee effect be detected?**

The detection of a genetic Allee effect requires investigations of each of the two successive steps: (1) a decrease in population size *causing* a change in the within-population genetic structure, and (2) a decrease in a fitness component *caused* by this change. For demonstration of the causal relationship underlying step 2, two confounding effects must be avoided: environmental effects and ecological Allee effects. It is possible to control for environmental effects by using experimental designs involving constant environments (e.g., Charlesworth 2006, Oakley and Winn 2012) or extracting fitness responses to environmental variability before analyzing the effect of population genetic structure (e.g., Hanski and Saccheri 2006, Saccheri *et al.* 1998). However, controlling for environmental variability may

nevertheless fail to separate genetic and ecological Allee effects, and some previously described ecological Allee effects may actually turn out to be genetic Allee effects. For instance, mating failures in small populations may result from a shortage of genetically compatible mates rather than a decrease in the frequency of encounters with conspecifics (Amos *et al.* 2001, Kokko and Rankin 2006, Moller and Legendre 2001). Only by experimental manipulations of population size and genetic variation with factorial designs can the genetic and ecological underpinnings of Allee effects be correctly disentangled. For example, genetic variation can be manipulated by modifying the number of founding families, whilst keeping census size constant (e.g., Elam *et al.* 2007, Hufbauer *et al.* 2013, Szűcs *et al.* 2014).

Three main mechanisms underlie the second step of genetic Allee effects: inbreeding depression, drift load, and migration load. Inbreeding depression occurs when individuals with higher inbreeding coefficients have lower fitness. It can be assessed by studying individuals from populations with known inbreeding coefficients or offspring from controlled inbred and outbred crosses (e.g., Elam *et al.* 2007, Hufbauer *et al.* 2013). Drift load is detected when between-population crosses result in heterosis, and if this effect is stronger in populations with lower heterozygosity or allelic richness (Escobar *et al.* 2008, Oakley and Winn 2012). The respective strengths of drift and selection can be estimated by comparing  $F_{st}$  and  $Q_{st}$  between pairs of populations, under certain conditions: (i) comparison of several groups of populations, with similar population sizes within groups and different population sizes between groups ( $F_{st}$  and  $Q_{st}$  are calculated between all pairs of populations within groups); (ii) the component of fitness measured is a quantitative trait, with a continuous distribution, influenced by multiple loci with small effects. If estimates of  $F_{st}$  and  $Q_{st}$  are similar for a quantitative fitness component, then drift is probably stronger than selection for this component. A positive relationship between the value of this fitness component and the difference between  $Q_{st}$  and  $F_{st}$  may indicate a relationship between genetic variation and fitness (Oakley and Winn 2012).

In the particular case of drift load involving plant self-incompatibility and balancing selection, the role of self-incompatibility in the relationship between genetic structure and fitness can be investigated by determining the proportion of incompatible crosses for which plants received pollen but produced no seeds (Fischer *et al.* 2003, Glémin *et al.* 2008, Willi *et al.* 2005). Finally, the demonstration that immigrants and/or hybrids have lower fitness components than residents is indicative of the presence of a migration load.

### **When does a genetic Allee effect cause a demographic Allee effect?**

Like any other component Allee effect, genetic Allee effects can lower mean individual fitness in small populations, thereby causing a decrease in the population growth rate (Angulo *et al.* 2007, Lennartsson 2002; Fig. 3). A notorious example is provided by research on the Glanville fritillary butterfly, *Melitaea cinxia*. In this species, small subpopulations are less heterozygous than large subpopulations, and less heterozygous females produce larvae with lower survival rates (Saccheri *et al.* 1998). The Glanville fritillary is therefore subject to a genetic Allee effect. Controlled crosses in the laboratory and in the field have confirmed the existence of inbreeding depression in this species (Nieminen *et al.* 2001). The combination of inbreeding depression with poor resource availability causes the extinction of small subpopulations of *M. cinxia*, as shown by the higher probability of extinction for smaller and less heterozygous populations living in less favorable environmental conditions (Saccheri *et al.* 1998). A genetic Allee effect also impacts demography in the plant *Clarkia pulchella*. Using an experimental approach, Newman and Pilson (1997) showed that populations founded by genetically related seedlings were subject to inbreeding depression and/or drift load and therefore had a lower growth rate than populations founded by unrelated seedlings. In several other species, genetically eroded populations have been shown to have a lower growth rate

(Fauvergue and Hopper 2009, Markert *et al.* 2010, Turcotte *et al.* 2013, Vercken *et al.* 2013, Wennersten *et al.* 2012). Fitness components were not measured in these studies, but the dynamics observed may reflect genetic Allee effects.

## **Genetic versus ecological Allee effects**

### *Temporal issues*

Genetic and ecological Allee effects are both component Allee effects capable of generating demographic Allee effects, but they differ in several ways, including the time scale. Genetic Allee effects are characterized by a time lag between the change in population size and its consequences for mean individual fitness, whereas an ecological Allee effect may occur as soon as population size decreases (*e.g.*, mating success decreases together with population density). The two steps of a genetic Allee effect may not occur over similar time scales: a decrease in population size may modify the genetic structure of the population over tens or thousands of generations, but fitness consequences may appear in the generation following the change in genetic structure (Amos and Balmford 2001, but see Hufbauer *et al.* 2013). Conversely, if population size increases, ecological Allee effects should die down almost immediately, whereas genetic Allee effects will not. For instance, after several generations of genetic drift, a population cannot recover its initial level of genetic variation unless new alleles arise by mutation or migration. This implies that a population can be rescued from a demographic threat, but, if the underlying genetic variation is not also restored, it may still suffer from a genetic Allee effect and be prone to extinction (this has been referred to as an “extinction debt”; Vercken *et al.* 2013).

### *Two steps for the genetic Allee effect*

The two steps of genetic Allee effects are idiosyncratic: each step can occur independently of the other, but the occurrence of the two steps in succession is necessary to create (and demonstrate) a genetic Allee effect. The first step, a change in genetic structure caused by a decrease in population size, can occur with no decrease in mean fitness (Step 1, but not Step 2). For instance, inbred individuals do not necessarily suffer from inbreeding depression. Indeed, although counterintuitive at first glance, inbreeding can even result in the purging of deleterious alleles, leading to an increase in mean fitness (Facon *et al.* 2011, Glémin 2003). Similarly, drift can randomly eliminate detrimental alleles and fix beneficial ones, and immigration in small populations can lower the negative impact of drift and inbreeding by bringing new adapted alleles and increasing heterozygosity. The second step, in which a change in the genetic structure of a population triggers a decrease in a component of fitness, is not necessarily induced by the first step, because genetic structure can change independently of population size, under the influences of mutation, migration or the mating system.

### *Evolutionary consequences*

The effects on individual fitness of ecological Allee effects could act as a selective force, driving the evolution of adaptations mitigating sensitivity to population size (Courchamp *et al.* 2008). For instance, long-range volatile sex pheromones may prevent mating failures (Fauvergue *et al.* 2007). The same reasoning applies to genetic Allee effects too. Inbreeding

depression may have shaped the evolution of dispersal, inbreeding avoidance and self-incompatibility systems (Penn and Potts 1999, Perrin and Mazalov 2000).

### **Conclusion: why is all this important?**

This focus on genetic Allee effects does not simply add a new semantic layer to processes that have been thoroughly discussed in the last few decades. On the contrary, it is essential, for several reasons.

First, although a genetic Allee effect has been mentioned in a few articles (starting with Fischer *et al.* 2000), no formal definition has ever been provided. We show here that a genetic Allee effect is not merely an Allee effect underpinned by genetic mechanisms. The formal definition we provide here includes two successive steps: a decrease in population size modifying the within-population genetic structure, in turn causing a decrease in the mean value of a component of individual fitness. The requirement of these two steps differentiates genetic Allee effects from ecological Allee effects. Genetic Allee effects are unique in terms of their potentially long time scale (particularly for the change in genetic structure in response to a decrease in population size) and their entropy (by contrast to ecological Allee effects, a population cannot recover instantly from a genetic Allee effect). According to the formal definition proposed here, some reported findings refer to a genetic Allee effect (including some from our own research; Fauvergue and Hopper 2009, Vercken *et al.* 2013), but without providing explicit evidence for such an effect. Alternatively, some minor types of Allee effect, such as the so-called S-Allee effect (Busch *et al.* 2014, Hoebee *et al.* 2012, Wagenius *et al.* 2007), may be seen as genetic Allee effects. The provision of a clear definition of the genetic Allee effect should prompt a better examination of the genetic mechanisms affecting fitness

and demography in small populations. We identified only 15 demonstrations of this particular type of component Allee effect in the literature, but we predict that widespread evidence of its existence will be obtained if the methods we propose are used to identify genetic Allee effects and to distinguish them from ecological Allee effects occurring in the same populations.

Second, a definition of the genetic Allee effect should promote a more comprehensive approach to the biology of small populations. The integration of demography and genetics has long been recognized as an important endeavor, but tangible progress is still required, particularly for the management of declining and/or bottlenecked populations (e.g., Fauvergue *et al.* 2012, Robert *et al.* 2007). Indeed, early developments in population viability analyses clearly assumed a feedback between demographic and genetic processes at the core of extinction vortices (Caughley 1994, Gilpin and Soulé 1986) and, more recently, the concept of evolutionary rescue has emerged as a race between demographic and evolutionary processes (Bell and Gonzalez 2009, Gonzalez *et al.* 2013). However, these concepts have generally been restricted to the analysis of demographic and environmental stochasticity, resulting in the neglect of the Allee effect as an important mechanism for small populations. Conversely, the Allee effect is attracting the attention of an increasing number of scientists with a general interest in the biology of small populations and extinction vortices. However, despite widespread evidence for the significant role of genetic processes, it is only very recently that theoretical works have started to combine Allee effects with genetic processes (Kanarek and Webb 2010, Kanarek *et al.* 2015, Roques *et al.* 2012, Shaw and Kokko 2014, Wittmann *et al.* 2014, Wittmann *et al.* 2014). The genetic Allee effect, as defined here, is at the very intersection of demography and genetics and should serve as a unifying paradigm. In the long term, the genetic Allee effect should contribute to improving the dialog between genetics and demography.



## Acknowledgments

This work was supported by the *Agence Nationale de la Recherche* (Sextinction project ANR-2010-BLAN-1717 and RARE project ANR-2009-PEXT-01001) and the *Fédération de Recherche sur la Biodiversité* (VORTEX project APP-IN-2009-052).

**Table 1.** Published evidence for genetic Allee effects in natural and experimental populations. Genetic Allee effects in natural populations are classified according to their underlying mechanism. Evidence for Step 1 indicates whether a relationship between population size and genetic structure was tested and found in the expected direction. Evidence for Step 2 indicates whether a relationship between genetic structure and a component of fitness was tested and found in the expected direction. Strong evidence for a genetic Allee effect implies evidence for both Steps 1 and 2. Evidence for Allee effect indicates whether a positive relationship between population size and a fitness component was observed; this corroborates but does not prove that a genetic Allee effect is occurring. Experimental populations are populations in which genetic structure was manipulated independently of population size. For the four examples concerning experimental populations, the mechanism causing the genetic Allee effect was not identified.

| Taxon                             | Evidence for Step 1 | Parameter of genetic structure                                         | Evidence for Step 2 | Fitness component                                   | Evidence for Allee effect | Reference                     |
|-----------------------------------|---------------------|------------------------------------------------------------------------|---------------------|-----------------------------------------------------|---------------------------|-------------------------------|
| <b>A. Inbreeding depression</b>   |                     |                                                                        |                     |                                                     |                           |                               |
| Plant <i>Cochealaria bavarica</i> | Yes                 | Number of polymorphic loci and observed heterozygosity for 8 allozymes | Untested            | Fruit set                                           | Yes                       | (Fischer <i>et al.</i> 2003)  |
| Plant <i>Ranunculus reptans</i>   | Yes                 | Mean kinship coefficient <sup>a</sup>                                  | Yes                 | Clonal performance <sup>b</sup> ; seed production   | No                        | (Willi <i>et al.</i> 2005)    |
| Insect <i>Melitaea cinxia</i>     | Yes                 | Observed heterozygosity at 7 enzymes and 1 microsatellite              | Yes                 | Larval survival; adult longevity; egg hatching rate | Untested                  | (Saccheri <i>et al.</i> 1998) |
| <b>B. Drift load</b>              |                     |                                                                        |                     |                                                     |                           |                               |
| Plant <i>Ranunculus reptans</i>   | Yes                 | Allelic diversity at 7 allozymes                                       | Yes                 | Seed production                                     | No                        | (Willi <i>et al.</i> 2005)    |
| Plant <i>Hypericum cumulicola</i> | Yes                 | Effective population size estimated from 10 microsatellites            | Untested            | Cumulative fitness <sup>c</sup>                     | Yes                       | (Oakley and Winn 2012)        |
| Mollusc <i>Physa acuta</i>        | Yes                 | Gene diversity at 10 microsatellites                                   | Untested            | Reproductive life-span                              | Yes                       | (Escobar <i>et al.</i> 2008)  |

|                                          |     |                                                                                                    |          |                                                                                                                                        |          |                                |
|------------------------------------------|-----|----------------------------------------------------------------------------------------------------|----------|----------------------------------------------------------------------------------------------------------------------------------------|----------|--------------------------------|
| Insect <i>Melitaea cinxia</i>            | Yes | Observed and expected heterozygosity and allelic richness at 9 microsatellites                     | Untested | Mating rate; egg clutch size; hatching rate; larval survival; larval weight; larval group size at diapause; lifetime larval production | Yes      | (Mattila <i>et al.</i> 2012)   |
| Amphibian <i>Rana temporaria</i>         | Yes | Difference $F_{st}$ - $Q_{st}$ for larval body size; allelic richness at 7 microsatellites         | Yes      | Body size; larval survival                                                                                                             | Untested | (Johansson <i>et al.</i> 2007) |
| Plant <i>Cochealaria bavarica</i>        | Yes | Number of alleles per locus, number of polymorphic loci and observed heterozygosity for isoenzymes | Untested | Compatibility of crosses                                                                                                               | Yes      | (Fischer <i>et al.</i> 2003)   |
| Plant <i>Ranunculus reptans</i>          | Yes | Allelic diversity at 7 allozymes                                                                   | Yes      | Compatibility of crosses                                                                                                               | No       | (Willi <i>et al.</i> 2005)     |
| Plant <i>Brassica insularis</i>          | Yes | Number and frequencies of self-incompatibility alleles                                             | Untested | Proportion of flowers pollinated with compatible pollen; fruit set                                                                     | Yes      | (Glémin <i>et al.</i> 2008)    |
| Plant <i>Rutidosia leptorrhynchoides</i> | Yes | Number and frequencies of self-incompatibility alleles                                             | Untested | Seed set                                                                                                                               | Yes      | (Young and Pickup 2010)        |
| Plant <i>Primula</i>                     | Yes | Morph frequencies                                                                                  | Untested | Number of fruits per flower                                                                                                            | Yes      | (Brys <i>et al.</i>            |

*vulgaris*

2007)

---

**C. Migration load**

---

|                                   |     |                    |     |                                |    |                            |
|-----------------------------------|-----|--------------------|-----|--------------------------------|----|----------------------------|
| Plant <i>Eucalyptus aggregata</i> | Yes | Hybridization rate | Yes | Germination rate; survivorship | No | (Field <i>et al.</i> 2008) |
|-----------------------------------|-----|--------------------|-----|--------------------------------|----|----------------------------|

---

**D. Experimental populations (Genetic structure manipulated independently of population size)**

---

|                                   |   |                                    |   |                                                      |     |                                |
|-----------------------------------|---|------------------------------------|---|------------------------------------------------------|-----|--------------------------------|
| Plant <i>Clarkia pulchella</i>    | - | Number of founding families        | - | Germination rate; survival rate from flower to fruit | Yes | (Newman and Pilson 1997)       |
| Plant <i>Raphanus sativus</i>     | - | Relatedness of founders            | - | Fruit set; number of seeds per fruit                 | Yes | (Elam <i>et al.</i> 2007)      |
| Plant <i>Lolium multiflorum</i>   | - | Number and relatedness of founders | - | Seed set; proportion of florets producing seeds      | Yes | (Firestone and Jasieniuk 2013) |
| Insect <i>Bemisia tabaci</i>      | - | Relatedness of founders            | - | Number of offspring                                  | Yes | (Hufbauer <i>et al.</i> 2013)  |
| Insect <i>Tribolium castaneum</i> | - | Relatedness of founders            | - | Number of offspring                                  | Yes | (Szűcs <i>et al.</i> 2014)     |

---

<sup>a</sup>Smaller populations have a lower allelic diversity at allozyme loci, and populations with lower allelic diversity have a higher kinship coefficient, but the relationship between population size and kinship coefficient was not tested.

<sup>b</sup>Proportion of ovules producing seedlings × number of rooted rosettes.

<sup>c</sup>Proportion fruit set × seed number per fruit × proportion germinating × proportion surviving and reproducing × fecundity.

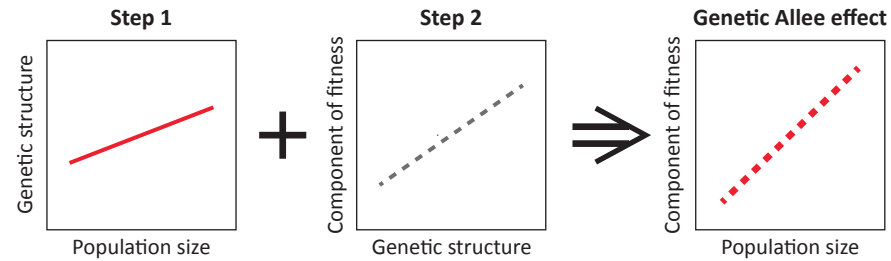

**Figure 1.** Two successive steps are necessary for a genetic Allee effect to occur. Step 1: a decrease in population size *causes* a change in (a parameter of) genetic structure (heterozygosity, frequency of detrimental and beneficial alleles, allelic richness). Step 2: The change in genetic structure *causes* a decrease in the value of a component of fitness through inbreeding depression, drift load or migration load. When both steps occur in a population, a component genetic Allee effect occurs (left panel).

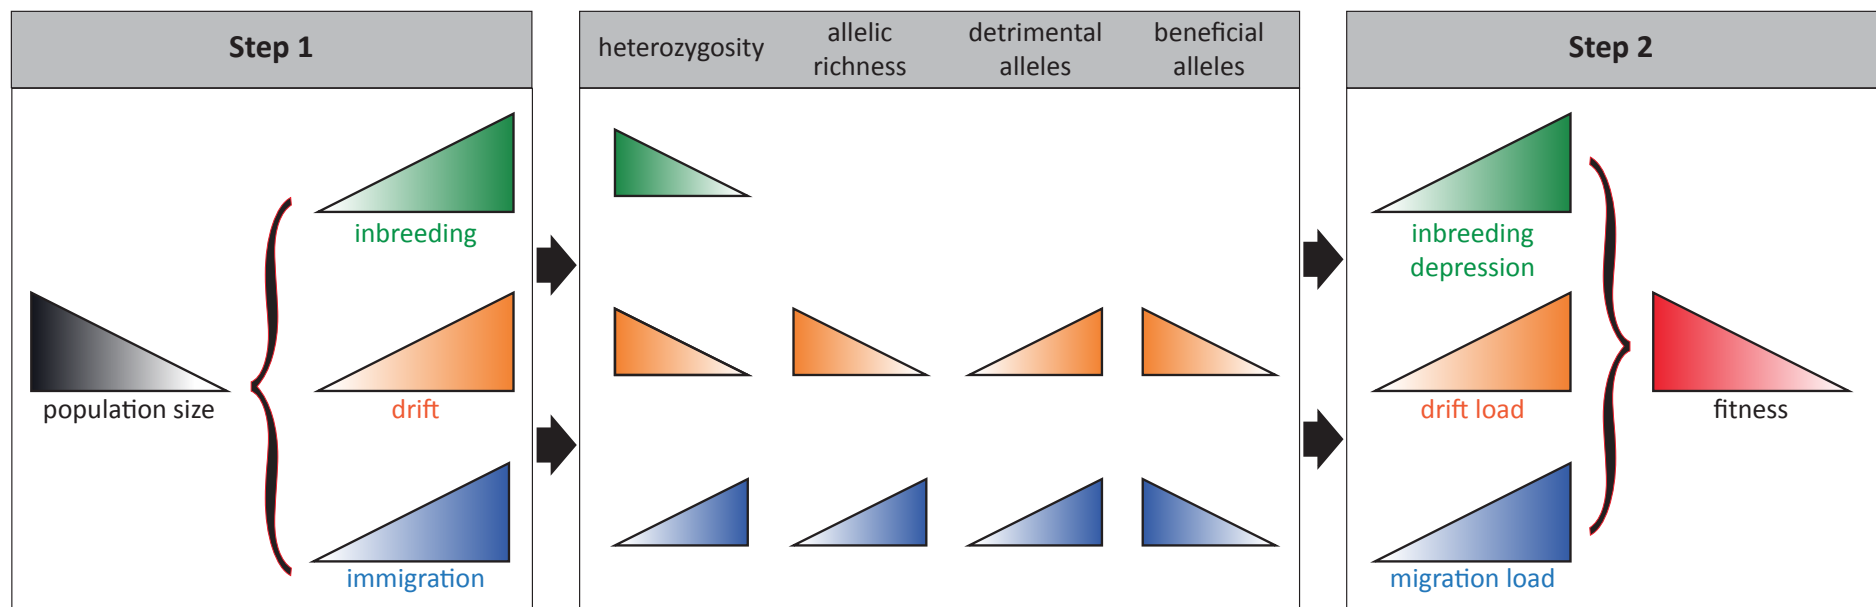

**Figure 2.** Scenarios underlying a genetic Allee effect. During Step 1, a decrease in population size *causes* an increase in inbreeding, a change in the drift/selection balance in favor of drift, and/or a higher proportion of immigrants in the population (assuming that both selection and migration are density-independent). Various population genetic structure variables are affected: heterozygosity, allelic richness, and the frequencies of detrimental and beneficial alleles. During step 2, these changes in genetic variation *cause* a decrease in the value of fitness components through inbreeding depression, drift load or migration load.



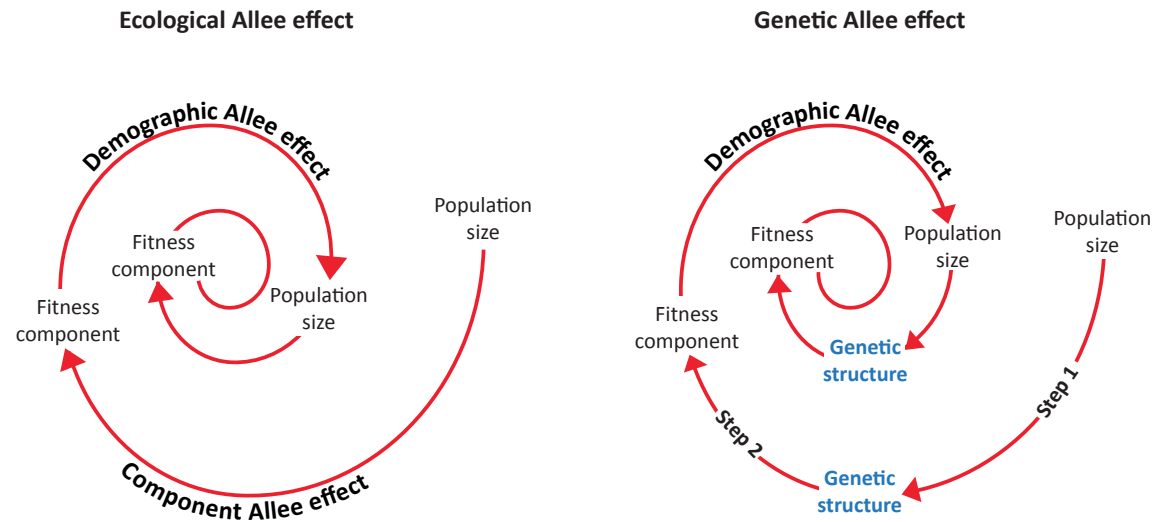

**Figure 3.** Ecological versus genetic Allee effects. In ecological Allee effects, a decrease in population size directly causes a decrease in a component of individual fitness. A genetic Allee effect is a two-step process. A decrease in population size induces a change in the genetic variation of the population via inbreeding, drift/selection balance or migration (Step 1). This change yields inbreeding depression, drift load or migration load, causing a decrease in the value of fitness components (Step 2). Both ecological and genetic component Allee effects can produce a demographic Allee effect, which, if strong, can generate an extinction vortex.

## References

- Amos, W. and Balmford, A. 2001. When does conservation genetics matter? - *Heredity* 87: 257-265.
- Amos, W., Wilmer, J. W. et al. 2001. Do female grey seals select genetically diverse mates? - *Animal Behaviour* 62: 157-164.
- Angulo, E., Roemer, G. W. et al. 2007. Double allee effects and extinction in the island fox. - *Conservation Biology* 21: 1082-1091.
- Bell, G. and Gonzalez, A. 2009. Evolutionary rescue can prevent extinction following environmental change. - *Ecology Letters* 12: 942-948.
- Berec, L., Angulo, E. et al. 2007. Multiple Allee effects and population management. - *Trends in Ecology and Evolution* 22: 185-191.
- Bolnick, D. I. and Nosil, P. 2007. Natural selection in populations subject to a migration load. - *Evolution* 61: 2229-2243.
- Bonsall, M. B., Dooley, C. A. et al. 2014. Allee effects and the spatial dynamics of a locally endangered butterfly, the high brown fritillary (*Argynnis adippe*). - *Ecological Applications* 24: 108-120.
- Brys, R., Jacquemyn, H. et al. 2007. Pollination success and reproductive output in experimental populations of the self-incompatible *Primula vulgaris*. - *International Journal of Plant Sciences* 168: 571-578.

- Busch, J. W., Witthuhn, T. et al. 2014. Fewer S-alleles are maintained in plant populations with sporophytic as opposed to gametophytic self-incompatibility. - Plant Species Biology 29: 34-46.
- Caughley, G. 1994. Directions in conservation biology. - Journal of Animal Ecology 63: 215-244.
- Charlesworth, D. 2006. Balancing selection and its effects on sequences in nearby genome regions. - PLoS Genetics 2: 379-384.
- Charlesworth, D., Morgan, M. T. et al. 1993. Mutation accumulation in finite outbreeding and inbreeding populations. - Genetical Research 61: 39-56.
- Charlesworth, D. and Willis, J. H. 2009. The genetics of inbreeding depression. - Nature Reviews Genetics 10: 783-796.
- Courchamp, F., Berec, L. et al. 2008. Allee effects in ecology and conservation. - Oxford University Press, Oxford.
- Courchamp, F., Clutton-Brock, T. et al. 1999. Inverse density dependence and the Allee effect. - Trends in Ecology and Evolution 14: 405-410.
- Davis, H. G., Taylor, C. M. et al. 2004. Pollen limitation causes an Allee effect in a wind-pollinated invasive grass (*Spartina alterniflora*). - Proceedings of the National Academy of Sciences of the United States of America 101: 13804-13807.
- Edmands, S. 2002. Does parental divergence predict reproductive compatibility? - Trends in Ecology & Evolution 17: 520-527.

- Eimes, J. A., Bollmer, J. L. et al. 2011. Rapid loss of MHC class II variation in a bottlenecked population is explained by drift and loss of copy number variation. - Journal of Evolutionary Biology 24: 1847-1856.
- Elam, D. R., Ridley, C. E. et al. 2007. Population size and relatedness affect fitness of a self-incompatible invasive plant. - Proceedings of the National Academy of Sciences of the United States of America 104: 549-552.
- Escobar, J. S., Nicot, A. et al. 2008. The different sources of variation in inbreeding depression, heterosis and outbreeding depression in a metapopulation of *Physa acuta*. - Genetics 180: 1593-1608.
- Facon, B., Hufbauer, R. A. et al. 2011. Inbreeding depression is purged in the invasive insect *Harmonia axyridis*. - Current Biology 21: 424-427.
- Fauvergue, X. and Hopper, K. R. 2009. French wasps in the New World: experimental biological control introductions reveal a demographic Allee effect. - Population Ecology 51: 385-397.
- Fauvergue, X., Malausa, J.-C. et al. 2007. Invading parasitoids suffer no Allee effect: a manipulative field experiment. - Ecology 88: 2392-2403.
- Fauvergue, X., Vercken, E. et al. 2012. The biology of small, introduced populations, with special reference to biological control. - Evolutionary Applications 5: 424-443.
- Field, D. L., Ayre, D. J. et al. 2008. Relative frequency of sympatric species influences rates of interspecific hybridization, seed production and seedling performance in the

uncommon *Eucalyptus aggregata*. - Journal of Ecology  
96: 1198-1210.

Firestone, J. L. and Jasieniuk, M. 2013. Small population size limits  
reproduction in an invasive grass through both  
demography and genetics. - Oecologia 172: 109-117.

Fischer, M., Hock, M. et al. 2003. Low genetic variation reduces  
cross-compatibility and offspring fitness in populations  
of a narrow endemic plant with a self- incompatibility  
system. - Conservation Genetics 4: 325-336.

Fischer, M., van Kleunen, M. et al. 2000. Genetic Allee effects on  
performance, plasticity and developmental stability in a  
clonal plant. - Ecology Letters 3: 530-539.

Frankham, R. 1995. Inbreeding and extinction: A threshold effect.  
- Conservation Biology 9: 792-799.

Frankham, R. 1996. Relationship of genetic variation to population  
size in wildlife. - Conservation Biology 10: 1500-1508.

Frankham, R. 1998. Inbreeding and extinction: Island populations.  
- Conservation Biology 12: 665-675.

Frankham, R. 2005. Genetics and extinction. - Biological  
Conservation 126: 131-140.

Gabriel, W. and Burger, R. 1994. Extinction risk by mutational  
meltdown: synergistic effects between population  
regulation and genetic drift.

Gabriel, W., Burger, R. et al. 1991. Population extinction by  
mutational load and demographic stochasticity.

Gilpin, M. E. and Soulé, M. E. 1986. Minimum viable populations:  
processes of extinction. - In: Soulé, M. E. (ed.)

Conservation Biology: the science of scarcity and diversity. Sinauer Associates, pp. 19-34.

Glémin, S. 2003. How are deleterious mutations purged? Drift versus nonrandom mating. - *Evolution* 57: 2678-2687.

Glémin, S., Petit, C. et al. 2008. Consequences of low mate availability in the rare self-incompatible species *Brassica insularis*. - *Conservation Biology* 22: 216-221.

Gomulkiewicz, R. and Holt, R. D. 1995. When does evolution by natural selection prevent extinction? - *Evolution* 49: 201-207.

Gonzalez, A., Ronce, O. et al. 2013. Evolutionary rescue: an emerging focus at the intersection between ecology and evolution. - *Philosophical Transactions of the Royal Society B-Biological Sciences* 368.

Grueber, C. E., Wallis, G. P. et al. 2013. Genetic drift outweighs natural selection at toll-like receptor (TLR) immunity loci in a re-introduced population of a threatened species. - *Molecular Ecology* 22: 4470-4482.

Hanski, I. and Saccheri, I. 2006. Molecular-level variation affects population growth in a butterfly metapopulation. - *PLoS Biol* 4: e129.

Hoebee, S. E., Angelone, S. et al. 2012. Diversity of S-Alleles and mate availability in 3 populations of self-incompatible wild pear (*Pyrus pyraeaster*). - *The Journal of Heredity* 103: 260-7.

Hufbauer, R. A., Rutschmann, A. et al. 2013. Role of propagule pressure in colonization success: disentangling the

relative importance of demographic, genetic and habitat effects. - Journal of Evolutionary Biology 26: 1691-1699.

Johansson, M., Primmer, C. R. et al. 2007. Does habitat fragmentation reduce fitness and adaptability? A case study of the common frog (*Rana temporaria*). - Molecular Ecology 16: 2693-2700.

Johnson, D. M., Liebhold, A. M. et al. 2006. Allee effects and pulsed invasion by the gypsy moth. - Nature 444: 361-363.

Kanarek, A. R. and Webb, C. T. 2010. Allee effects, adaptive evolution, and invasion success. - Evolutionary Applications 3: 122-135.

Kanarek, A. R., Webb, C. T. et al. 2015. Overcoming Allee effects through evolutionary, genetic, and demographic rescue. - Journal of Biological Dynamics 9.

Kimura, M. 1983. Rare variant alleles in the light of the neutral theory. - Molecular Biology and Evolution 1: 84-93.

Kokko, H. and Lopez-Sepulcre, A. 2007. The ecogenetic link between demography and evolution: can we bridge the gap between theory and data? - Ecology Letters 10: 773-782.

Kokko, H. and Rankin, D. J. 2006. Lonely hearts or sex in the city? Density-dependent effects in mating systems. - Philosophical Transactions of the Royal Society B-Biological Sciences 361: 319-334.

Kuparinen, A., Keith, D. M. et al. 2014. Allee effect and the uncertainty of population recovery. - Conservation Biology 28: 790-798.

- Lande, R. 1994. Risk of population extinction from fixation of new deleterious mutations. - *Evolution* 48: 1460-1469.
- Lanfear, R., Kokko, H. et al. 2014. Population size and the rate of evolution. - *Trends in Ecology & Evolution* 29: 33-41.
- Leimu, R., Mutikainen, P. et al. 2006. How general are positive relationships between plant population size, fitness and genetic variation? - *Journal of Ecology* 94: 942-952.
- Lennartsson, T. 2002. Extinction thresholds and disrupted plant-pollinator interactions in fragmented plant populations. - *Ecology* 83: 3060-3072.
- Lenormand, T. 2002. Gene flow and the limits to natural selection. - *Trends in Ecology & Evolution* 17: 183-189.
- Levin, D. A., Kelley, C. D. et al. 2009. Enhancement of Allee effects in plants due to self-incompatibility alleles. - *Journal of Ecology* 97: 518-527.
- Li, L., Lu, K. et al. 2008. Dominance, overdominance and epistasis condition the heterosis in two heterotic rice hybrids. - *Genetics* 180: 1725-1742.
- Lynch, M., Conery, J. et al. 1995. Mutation accumulation and the extinction of small populations. - *American Naturalist* 146: 489-518.
- Lynch, M., Conery, J. et al. 1995. Mutational meltdowns in sexual populations. - *Evolution* 49: 1067-1080.
- Malécot, G. 1969. Consanguinité panmictique et consanguinité systématique. - *Annales de Génétique et Sélection Animale* 1: 237-242.



- Markert, J. A., Champlin, D. M. et al. 2010. Population genetic diversity and fitness in multiple environments. - BMC Evolutionary Biology 10.
- Mattila, A. L. K., Duplouy, A. et al. 2012. High genetic load in an old isolated butterfly population. - Proceedings of the National Academy of Sciences of the United States of America 109: E2496-E2505.
- Metcalf, C. J. E. and Pavard, S. 2007. Why evolutionary biologists should be demographers. - Trends in Ecology & Evolution 22: 205-212.
- Moller, A. P. and Legendre, S. 2001. Allee effect, sexual selection and demographic stochasticity. - Oikos 92: 27-34.
- Newman, D. and Pilson, D. 1997. Increased probability of extinction due to decreased genetic effective population size: Experimental populations of *Clarkia pulchella*. - Evolution 51: 354-362.
- Nielsen, R. and Slatkin, M. 2013. An introduction to population genetics: theory and applications. - Sinauer and Associates.
- Nieminen, M., Singer, M. C. et al. 2001. Experimental confirmation that inbreeding depression increases extinction risk in butterfly populations. - American Naturalist 157: 237-244.
- Oakley, C. G. and Winn, A. A. 2012. Effects of population size and isolation on heterosis, mean fitness, and inbreeding depression in a perennial plant. - New Phytologist 196: 261-270.

- Oostermeijer, J. G. B., Luijten, S. H. et al. 2003. Integrating demographic and genetic approaches in plant conservation. - *Biological Conservation* 113: 389-398.
- Pelletier, F., Garant, D. et al. 2009. Eco-evolutionary dynamics. - *Philosophical Transactions of the Royal Society B-Biological Sciences* 364: 1483-1489.
- Penn, D. J. and Potts, W. K. 1999. The evolution of mating preferences and major histocompatibility complex genes. - *American Naturalist* 153: 145-164.
- Perrin, N. and Mazalov, V. 2000. Local competition, inbreeding, and the evolution of sex-biased dispersal. - *American Naturalist* 155: 116-127.
- Reed, D. H. and Frankham, R. 2003. Correlation between fitness and genetic diversity. - *Conservation Biology* 17: 230-237.
- Robert, A., Couvet, D. et al. 2007. Integration of demography and genetics in population restorations. - *Ecoscience* 14: 463-471.
- Ronce, O. and Kirkpatrick, M. 2001. Migrational meltdown in heterogeneous habitats. - *Evolution* 55: 1520-1531.
- Roques, L., Garnier, J. et al. 2012. Allee effect promotes diversity in traveling waves of colonization. - *Proceedings of the National Academy of Sciences of the United States of America* 109: 8828-8833.
- Saccheri, I., Kuussaari, M. et al. 1998. Inbreeding and extinction in a butterfly metapopulation. - *Nature* 392: 491-494.

- Shaw, A. K. and Kokko, H. 2014. Mate finding, Allee effects and selection for sex-biased dispersal. - *Journal of Animal Ecology* 83: 1256-1267.
- Sjödin, P., Kaj, I. et al. 2005. On the meaning and existence of an effective population size. - *Genetics* 169: 1061-1070.
- Soulé, M. E. 1980. Thresholds for survival: maintaining fitness and evolutionary potential. - In: Soulé, M. E. and Wilcox, B. A. (eds.), *Conservation Biology: An Evolutionary-Ecological Perspective*. Sinauer & Associates, pp. 151-169.
- Spielman, D., Brook, B. W. et al. 2004. Most species are not driven to extinction before genetic factors impact them. - *Proceedings of the National Academy of Sciences of the United States of America* 101: 15261-15264.
- Stephens, P. A., Sutherland, W. J. et al. 1999. What is the Allee effect? - *Oikos* 87: 185-190.
- Szücs, M., Melbourne, B. A. et al. 2014. The roles of demography and genetics in the early stages of colonization. - *Proceedings of the Royal Society B-Biological Sciences* 281.
- Tanaka, Y. 2000. Extinction of populations by inbreeding depression under stochastic environments. - *Population Ecology* 42: 55-62.
- Taylor, C. M. and Hastings, A. 2005. Allee effects in biological invasions. - *Ecology Letters* 8: 895-908.
- Turcotte, M. M., Reznick, D. N. et al. 2013. Experimental test of an eco-evolutionary dynamic feedback loop between evolution and population density in the green peach aphid. - *American Naturalist* 181: S46-S57.

- Vercken, E., Vincent, F. et al. 2013. Time-lag in extinction dynamics in experimental populations: evidence for a genetic Allee effect? - *Journal of Animal Ecology* 82: 621-631.
- Wagenius, S., Lonsdorf, E. et al. 2007. Patch aging and the S-allee effect: Breeding system effects on the demographic response of plants to habitat fragmentation. - *American Naturalist* 169: 383-397.
- Waples, R. S. and Gaggiotti, O. 2006. What is a population? An empirical evaluation of some genetic methods for identifying the number of gene pools and their degree of connectivity. - *Molecular Ecology* 15: 1419-1439.
- Wennersten, L., Johansson, J. et al. 2012. Higher establishment success in more diverse groups of pygmy grasshoppers under seminatural conditions. - *Ecology* 93: 2519-2525.
- Whitlock, M. C. 2000. Fixation of new alleles and the extinction of small populations: Drift load, beneficial alleles, and sexual selection. - *Evolution* 54: 1855-1861.
- Willi, Y., Van Buskirk, J. et al. 2005. A threefold genetic allee effect: Population size affects cross-compatibility, inbreeding depression and drift load in the self-incompatible *Ranunculus reptans*. - *Genetics* 169: 2255-2265.
- Wittmann, M. J., Gabriel, W. et al. 2014. Genetic diversity in introduced populations with an Allee Effect. - *Genetics* 198: 299-+.
- Wittmann, M. J., Gabriel, W. et al. 2014. Population genetic consequences of the Allee Effect and the role of offspring-number variation. - *Genetics* 198: 311-+.

- Wright, S. 1969. Evolution and the genetics of populations,  
volume 2: the theory of gene frequencies. - University of  
Chicago Press.
- Young, A. G. and Pickup, M. 2010. Low S-allele numbers limit mate  
availability, reduce seed set and skew fitness in small  
populations of a self-incompatible plant. - Journal of  
Applied Ecology 47: 541-548.
- Zayed, A. and Packer, L. 2005. Complementary sex determination  
substantially increases extinction proneness of  
haplodiploid populations. - Proceedings of the National  
Academy of Sciences of the United States of America  
102: 10742-10746.
